# Supplementary material
Source: MDPI journal article supplement (https://www.mdpi.com/1999-4907/14/5/1042)
Supplement: s1 [file s1]

**Table S1.** Analysis of variance (ANOVA) for the daily transpiration rate of tree seedlings as influenced by mean leaf angles and irrigation volumes at the end of the nursery phase

| Source                              | Degrees of freedom | Sum of Squares | Mean Square | F Value | p Value  |
|-------------------------------------|--------------------|----------------|-------------|---------|----------|
| Irrigation volume                   | 3                  | 37.99834       | 12.66611    | 58.79   | < 0.0001 |
| Error (a)                           | 12                 | 2.58537        | 0.21545     | -       | -        |
| Plots                               | 15                 | 40.58370       | -           | -       | -        |
| Mean leaf angle                     | 8                  | 2,720.35543    | 340.04443   | 980.14  | < 0.0001 |
| Irrigation volume x Mean leaf angle | 24                 | 26.27171       | 1.094655    | 3.16    | < 0.0001 |
| Error (b)                           | 96                 | 33.30573       | 0.346935    | -       | -        |
| Total                               | 143                | 2,820.51658    | -           | -       | -        |
