# Supplementary material
Source: MDPI journal article supplement (https://www.mdpi.com/1999-4907/14/5/1042)
Supplement: s1 [file s1]

**Table S7.** Analysis of variance (ANOVA) for the SPAD values of tree seedlings as influenced by mean leaf angles and irrigation volumes at the end of the nursery phase

| Source                              | Degrees of freedom | Sum of Squares | Mean Square | F Value | p Value  |
|-------------------------------------|--------------------|----------------|-------------|---------|----------|
| Irrigation volume                   | 3                  | 658.20743      | 219.40248   | 97.34   | < 0.0001 |
| Error (a)                           | 12                 | 27.04694       | 2.25391     | -       | -        |
| Plots                               | 15                 | 685.25438      | -           | -       | -        |
| Mean leaf angle                     | 8                  | 7,526.60806    | 940.82601   | 285.98  | < 0.0001 |
| Irrigation volume x Mean leaf angle | 24                 | 655.02694      | 27.29279    | 8.30    | < 0.0001 |
| Error (b)                           | 96                 | 315.82056      | 3.28980     | -       | -        |
| Total                               | 143                | 9,182.70993    | -           | -       | -        |
