# Supplementary material
Source: MDPI journal article supplement (https://www.mdpi.com/1999-4907/14/5/1042)
Supplement: s1 [file s1]

**Table S5.** Analysis of variance (ANOVA) for the chlorophyll *b* content of tree seedlings as influenced by mean leaf angles and irrigation volumes at the end of the nursery phase

| Source                              | Degrees of freedom | Sum of Squares | Mean Square | F Value | p Value  |
|-------------------------------------|--------------------|----------------|-------------|---------|----------|
| Irrigation volume                   | 3                  | 0.01148        | 0.00383     | 73.40   | < 0.0001 |
| Error (a)                           | 12                 | 0.00063        | 0.00005     | -       | -        |
| Plots                               | 15                 | 0.01211        | -           | -       | -        |
| Mean leaf angle                     | 8                  | 0.10096        | 0.01262     | 618.85  | < 0.0001 |
| Irrigation volume x Mean leaf angle | 24                 | 0.01643        | 0.00069     | 33.57   | < 0.0001 |
| Error (b)                           | 96                 | 0.00196        | 0.00002     | -       | -        |
| Total                               | 143                | 0.13145        | -           | -       | -        |
