# Supplementary material
Source: MDPI journal article supplement (https://www.mdpi.com/1999-4907/14/5/1042)
Supplement: s1 [file s1]

**Table S8.** Mean leaf area (cm<sup>2</sup>) at the end of the nursery phase of nine tree seedling species with different mean leaf angles submitted to four daily irrigation volumes

| <b>Species</b>                                     | <b>Mean leaf angle</b> | <b>Mean leaf area</b>  |
|----------------------------------------------------|------------------------|------------------------|
| <i>Genipa americana</i> L.                         | 58°                    | 507.01 cm <sup>2</sup> |
| <i>Magnolia ovata</i> (A.St.-Hil.) Spreng.         | 57°                    | 319.05 cm <sup>2</sup> |
| <i>Psidium cattleianum</i> Sabine                  | 55°                    | 202.62 cm <sup>2</sup> |
| <i>Moquiniastrum polymorphum</i> (Less.) G. Sancho | 42°                    | 207.29 cm <sup>2</sup> |
| <i>Lafoensia pacari</i> A.St.-Hil.                 | 38°                    | 181.95 cm <sup>2</sup> |
| <i>Esenbeckia leiocarpa</i> Engl.                  | 31°                    | 264.10 cm <sup>2</sup> |
| <i>Guazuma ulmifolia</i> Lam.                      | -14°                   | 392.33 cm <sup>2</sup> |
| <i>Heliocarpus popayanensis</i> Kunth              | -54°                   | 45.73 cm <sup>2</sup>  |
| <i>Croton floribundus</i> Spreng.                  | -56°                   | 122.13 cm <sup>2</sup> |
