# Supplementary material
Source: MDPI journal article supplement (https://www.mdpi.com/1999-4907/14/5/1042)
Supplement: s1 [file s1]

**Table S3.** Analysis of variance (ANOVA) for the carotenoids content of tree seedlings as influenced by mean leaf angles and irrigation volumes at the end of the nursery phase

| Source                              | Degrees of freedom | Sum of Squares | Mean Square | F Value | p Value  |
|-------------------------------------|--------------------|----------------|-------------|---------|----------|
| Irrigation volume                   | 3                  | 0.00679        | 0.00226     | 27.51   | < 0.0001 |
| Error (a)                           | 12                 | 0.00099        | 0.00008     | -       | -        |
| Plots                               | 15                 | 0.00777        | -           | -       | -        |
| Mean leaf angle                     | 8                  | 0.13017        | 0.01627     | 804.18  | < 0.0001 |
| Irrigation volume x Mean leaf angle | 24                 | 0.02173        | 0.00091     | 44.75   | < 0.0001 |
| Error (b)                           | 96                 | 0.00194        | 0.00002     | -       | -        |
| Total                               | 143                | 0.16162        | -           | -       | -        |
