# Supplementary material
Source: MDPI journal article supplement (https://www.mdpi.com/1999-4907/14/5/1042)
Supplement: s1 [file s1]

**Table S4.** Analysis of variance (ANOVA) for the chlorophyll *a* content of tree seedlings as influenced by mean leaf angles and irrigation volumes at the end of the nursery phase

| Source                              | Degrees of freedom | Sum of Squares | Mean Square | F Value  | p Value  |
|-------------------------------------|--------------------|----------------|-------------|----------|----------|
| Irrigation volume                   | 3                  | 0.06148        | 0.02049     | 260.97   | < 0.0001 |
| Error (a)                           | 12                 | 0.00094        | 0.00008     | -        | -        |
| Plots                               | 15                 | 0.06242        | -           | -        | -        |
| Mean leaf angle                     | 8                  | 0.69681        | 0.08710     | 3,855.69 | < 0.0001 |
| Irrigation volume x Mean leaf angle | 24                 | 0.12206        | 0.00509     | 225.14   | < 0.0001 |
| Error (b)                           | 96                 | 0.00217        | 0.00002     | -        | -        |
| Total                               | 143                | 0.88346        | -           | -        | -        |
