# Supplementary material
Source: MDPI journal article supplement (https://www.mdpi.com/1999-4907/14/5/1042)
Supplement: s1 [file s1]

**Table S6.** Analysis of variance (ANOVA) for the anthocyanins content of tree seedlings as influenced by mean leaf angles and irrigation volumes at the end of the nursery phase

| Source                              | Degrees of freedom | Sum of Squares | Mean Square | F Value | p Value  |
|-------------------------------------|--------------------|----------------|-------------|---------|----------|
| Irrigation volume                   | 3                  | 0.00228        | 0.00076     | 10.26   | 0.0012   |
| Error (a)                           | 12                 | 0.00089        | 0.00007     | -       | -        |
| Plots                               | 15                 | 0.00317        | -           | -       | -        |
| Mean leaf angle                     | 8                  | 0.15147        | 0.01893     | 791.02  | < 0.0001 |
| Irrigation volume x Mean leaf angle | 24                 | 0.03542        | 0.00148     | 61.66   | < 0.0001 |
| Error (b)                           | 96                 | 0.00230        | 0.00002     | -       | -        |
| Total                               | 143                | 0.19236        | -           | -       | -        |
