# Supplementary material
Source: MDPI journal article supplement (https://www.mdpi.com/1999-4907/14/5/1042)
Supplement: s1 [file s1]

**Table S2.** Analysis of variance (ANOVA) for the leaf water potential of tree seedlings as influenced by mean leaf angles and irrigation volumes at the end of the nursery phase

| Source                              | Degrees of freedom | Sum of Squares | Mean Square | F Value | p Value  |
|-------------------------------------|--------------------|----------------|-------------|---------|----------|
| Irrigation volume                   | 3                  | 3.77831        | 1.25944     | 27.73   | < 0.0001 |
| Error (a)                           | 12                 | 0.54493        | 0.04541     | -       | -        |
| Plots                               | 15                 | 4.32324        | -           | -       | -        |
| Mean leaf angle                     | 8                  | 53.83281       | 6.72910     | 72.09   | < 0.0001 |
| Irrigation volume x Mean leaf angle | 24                 | 4.13485        | 0.17229     | 1.85    | 0.0195   |
| Error (b)                           | 96                 | 8.96147        | 0.09335     | -       | -        |
| Total                               | 143                | 71.25238       | -           | -       | -        |
