# Supplementary material
Source: MDPI journal article supplement (https://www.mdpi.com/1999-4907/14/5/1042)
Supplement: s1 [file s1]

Archive with 8 entries (8 files):
- Supplementary file - Table S1.pdf
- Supplementary file - Table S2.pdf
- Supplementary file - Table S3.pdf
- Supplementary file - Table S4.pdf
- Supplementary file - Table S5.pdf
- Supplementary file - Table S6.pdf
- Supplementary file - Table S7.pdf
- Supplementary file - Table S8.pdf
